# Supplementary material for: Pretreatment neutrophil-to-lymphocyte ratio and mutational burden as biomarkers of tumor response to immune checkpoint inhibitors
Source: PubMed Central journal article supplement (PMC7851155; doi:10.1038/s41467-021-20935-9), 2021-02-01
Supplement: 41467_2021_20935_MOESM2_ESM.pdf [file 41467_2021_20935_MOESM2_ESM.pdf]

## **Description of Additional Supplementary Files**

File Name: Supplementary Data 1

Description: Complete NLR, TMB, and other clinical, pathological and genomic data for 1714 ICI-treated patients in the primary cohort and 323 ICI-treated patients in the validation cohort, and the genes on each version of the IMPACT panel.
